# Supplementary material for: Structure of the Scientific Community Modelling the Evolution of Resistance
Source: PLOS journal article supplement (doi:10.1371/journal.pone.0001275), 2007-12-05
Supplement: S3 (10.1371/journal.pone.0001275.s003) [file journal.pone.0001275.s003]

**Table S3.** Multiresponse permutation procedure (MRPP) analysis of group dissimilarities showing mean citation distance between articles and mean source articles distance between citations in each citation group. The chance-corrected agreement index (A) expresses the within-group homogeneity and has a maximum value of 1 when there is no dissimilarity among elements of any group. The *p*-value is the probability of obtaining by chance a value of A equal or larger than the observed value.

|                | Among Articles According to Their Citations |          |       |                 |  | Among Citations According to Their Source Articles |          |       |                 |
|----------------|---------------------------------------------|----------|-------|-----------------|--|----------------------------------------------------|----------|-------|-----------------|
| Citation Group | Group Size                                  | Distance | A     | <i>p</i> -value |  | Group Size                                         | Distance | A     | <i>p</i> -value |
| C1             | 138                                         | 0.98     | 0.010 | $<10^{-3}$      |  | 631                                                | 0.98     | 0.013 | $<10^{-3}$      |
| C2             | 44                                          | 0.96     |       |                 |  | 226                                                | 0.95     |       |                 |
