# Supplementary material for: Structure of the Scientific Community Modelling the Evolution of Resistance
Source: PLOS journal article supplement (doi:10.1371/journal.pone.0001275), 2007-12-05
Supplement: S7 (10.1371/journal.pone.0001275.s007) [file journal.pone.0001275.s007]

**Table S7.** Multiresponse permutation procedure (MRPP) analysis of group dissimilarities showing mean citation distance between articles and mean source article distance between citations in each citation group. The chance-corrected agreement index (A) expresses the within-group homogeneity and has a maximum value of 1 when there is no dissimilarity between elements of a group. The *p*-value is the probability of obtaining by chance a value of A equal or larger than the observed value. Here the C1 cluster was split into 7 subgroups and the whole network therefore had 8 groups.

|                | Among Articles According to Their Citations |          |       |                 |  | Among Citations According to Their Source Articles |          |       |                 |
|----------------|---------------------------------------------|----------|-------|-----------------|--|----------------------------------------------------|----------|-------|-----------------|
| Citation group | Group Size                                  | Distance | A     | <i>p</i> -value |  | Group Size                                         | Distance | A     | <i>p</i> -value |
| C1, subgroup 1 | 13                                          | 0.92     | 0.058 | $<10^{-3}$      |  | 53                                                 | 0.85     | 0.081 | $<10^{-3}$      |
| C1, subgroup 2 | 18                                          | 0.94     |       |                 |  | 88                                                 | 0.89     |       |                 |
| C1, subgroup 3 | 16                                          | 0.82     |       |                 |  | 51                                                 | 0.89     |       |                 |
| C1, subgroup 4 | 10                                          | 0.89     |       |                 |  | 28                                                 | 0.82     |       |                 |
| C1, subgroup 5 | 5                                           | 0.77     |       |                 |  | 46                                                 | 0.64     |       |                 |
| C1, subgroup 6 | 11                                          | 0.89     |       |                 |  | 104                                                | 0.84     |       |                 |
| C1, subgroup 7 | 65                                          | 0.95     |       |                 |  | 261                                                | 0.96     |       |                 |
| C2             | 44                                          | 0.96     |       |                 |  | 226                                                | 0.95     |       |                 |
