# Supplementary material for: Structure of the Scientific Community Modelling the Evolution of Resistance
Source: PLOS journal article supplement (doi:10.1371/journal.pone.0001275), 2007-12-05
Supplement: S11 (10.1371/journal.pone.0001275.s011) [file journal.pone.0001275.s011]

**Table S11.** Formulae used to search for relevant articles describing models of the evolution of resistance to pesticides and drugs within the CABs (1973-2006), Current Contents (1998-2006), and Medline (1950-2006) databases. The ‘final formula’ for each database search consisted in the combination of the common and the database-specific formulae. Thus, the ‘Number of hits’ column presents the results of these combinations. This search provided a total dataset of 1,894 non redundant references (see Table S1).

| Type of Formula | Database         | Timespan  | Type of Descriptors               | Formula of Descriptors                                                                                                                                                                                                                                  | Number of hits |
|-----------------|------------------|-----------|-----------------------------------|---------------------------------------------------------------------------------------------------------------------------------------------------------------------------------------------------------------------------------------------------------|----------------|
| Common          | All              | 1973-2006 | Topics                            | (insecticid* OR fungicid* OR herbicid* OR nematocid* OR acaricid* OR rodenticid* OR miticid* OR pesticid* OR antibio* OR antivir* OR bacillus) AND (resistan*) AND (model*)                                                                             | -              |
| Specific        | CABs             | 1973-2006 | Cabicodes                         | ((HH000 or HH400 or HH405 or HH410 or FF500 or FF600) and DE=models)*                                                                                                                                                                                   | 817            |
|                 | Current Contents | 1998-2006 | Scientific area codes restriction | ((Plant Sciences) OR (Multidisciplinary) OR (Experimental Biology) OR (Biology) OR (Molecular Biology Genetics) OR (Entomology Pest Control) OR (Research Laboratory Medicine Medical Technology) OR (Medical Research General Topics) OR (Immunology)) | 808            |
|                 | Medline          | 1950-2006 | MeSH                              | "Drug Resistance"[MAJR] OR "Drug Tolerance"[MAJR] OR "Models, Theoretical"[MAJR] OR "Computer Simulation"[MAJR] OR "Mathematical Computing"[MAJR] OR "Evolution"[MAJR] OR "Adaptation, Biological"[MAJR]                                                | 360            |

\* Codes used for the Cabicodes:

H000: Pathogen, Pest and Parasite and Weed Management (General)

HH400: Pesticides and Drugs (General)

HH405: Pesticides and Drugs: Control

HH410: Pesticide and Drug Resistance

FF500: Weeds and Noxious Plants

FF600: Pests, Pathogens and Biogenic Diseases of Plants.
